# Supplementary material for: Sensitivity of allyl isothiocyanate to induce apoptosis via ER stress and the mitochondrial pathway upon ROS production in colorectal adenocarcinoma cells
Source: PubMed Central journal article supplement — Oncol Rep. 2020 Jul 21;44(4):1415–24. doi: 10.3892/or.2020.7700 (PMC7448487; doi:10.3892/or.2020.7700), 2020-07-21
Supplement: Supplementary_Data.pdf [file Supplementary_Data.pdf]

Table SI. AITC causes G2/M phase arrest of human colorectal adenocarcinoma cell line HT-29.

| Cell cycle distribution (%) | Control      | AITC ( $\mu$ M) |              |              |
|-----------------------------|--------------|-----------------|--------------|--------------|
|                             |              | 5               | 10           | 20           |
| Sub-G1 population           | 2.39         | 18.23           | 25.31        | 30.25        |
| G0/G1 phase                 | 45.29        | 30.14           | 25.64        | 19.44        |
| S phase                     | 30.24        | 24.32           | 18.47        | 15.69        |
| G2/M phase                  | <b>22.08</b> | <b>27.31</b>    | <b>30.58</b> | <b>34.62</b> |

AITC, allyl isothiocyanate. After exposure to 5, 10 and 20  $\mu$ M of AITC for 24 h, the cells in the G2/M phase were markedly increased compared with the control, and this effect was concentration dependent (Fig. 2A and Table SI).
